# Supplementary material
Source: Springer Nature journal article supplement (https://www.springermedizin.de/resource/supplementary/13012_2006_70_MOESM2_ESM.pdf/9629192)
Supplement: MOESM2 [file 9629192]

We are interested in your views about medical information. Please rate your agreement or disagreement with each statement on the following scale.

SA = Strongly Agree; A = Agree; N = Neutral; D = Disagree; SD = Strongly Disagree

|     |                                                                                                                                |    |   |   |   |    |
|-----|--------------------------------------------------------------------------------------------------------------------------------|----|---|---|---|----|
| 1.  | Clinical experience is more important than randomized controlled trials                                                        | SA | A | N | D | SD |
| 2.  | I am comfortable practicing in ways different than other doctors                                                               | SA | A | N | D | SD |
| 3.  | Evidence-based medicine makes a lot of sense to me                                                                             | SA | A | N | D | SD |
| 4.  | I don't have the time to read up on every practice decision                                                                    | SA | A | N | D | SD |
| 5.  | It is best to change the way I treat a certain problem when my local colleagues are making the same changes                    | SA | A | N | D | SD |
| 6.  | I follow practice guidelines if they are not too much hassle                                                                   | SA | A | N | D | SD |
| 7.  | The opinions of respected authorities should guide clinical practice                                                           | SA | A | N | D | SD |
| 8.  | I am too busy taking care of patients to keep up with the recent literature                                                    | SA | A | N | D | SD |
| 9.  | Clinical experience is the most reliable way to know what really works                                                         | SA | A | N | D | SD |
| 10. | I am uncomfortable doing things differently from the way I was trained                                                         | SA | A | N | D | SD |
| 11. | I am often critical of accepted practices                                                                                      | SA | A | N | D | SD |
| 12. | Patient care should be based where possible on randomized controlled trials, rather than the opinions of respected authorities | SA | A | N | D | SD |
| 13. | My colleagues consider me to be someone who marches to my own drummer                                                          | SA | A | N | D | SD |
| 14. | I follow practice guidelines as long as they don't interfere too much with the flow of patients                                | SA | A | N | D | SD |
| 15. | It is not prudent to practice out of step with other physicians in my area                                                     | SA | A | N | D | SD |
| 16. | The best practice guidelines are based on the results of randomized controlled trials                                          | SA | A | N | D | SD |
| 17. | Evidence-based medicine is not very practical in real patient care                                                             | SA | A | N | D | SD |

Thank you for completing this survey!
